# Supplementary material
Source: PubMed Central journal article supplement (PMC3324631)
Supplement: NIHMS358002-supplement-1.pdf [file NIHMS358002-supplement-1.pdf]

**Supporting Data Table 1. GenBank accession numbers for sequences used in figures 2 and 5.**

**Figure 2**

| <b>Sequence</b>           | <b>GenBank #</b> | <b>Sequence</b> | <b>GenBank #</b> |
|---------------------------|------------------|-----------------|------------------|
| Human 968                 | FJ488968         | Cow 502         | AF015502         |
| Human 147                 | X64147           | Cow 841         | AAB68841         |
| Human 714                 | X05714           | Sheep 104       | AJ505104         |
| Human 161                 | AY393161         | Sheep 120       | AJ505120         |
| Human 199                 | AF471499         | Goat 748        | EU344748         |
| Human 547                 | FM206547         | Goat 604        | EU182604         |
| Human 668                 | ACS95668         | Llama 297       | AM180297         |
| Human 926                 | AB202926         | Llama 575       | AY544575         |
| Human 904                 | AB202904         | Llama 133       | AY342133         |
| Human 607                 | BAH04607         | Llama 486       | AF441486         |
| Sumatran Orangutan<br>722 | CR857722         | Camel 173       | AJ245173         |
| Olive Baboon 362          | AF416362         | Camel 669       | FN665669         |
| Rhesus monkey 846         | DQ437846         | Horse 431       | DQ125431         |
| Marmoset 359              | AF397359         | Possum 440      | AAT40440         |
| Marmoset 164              | AF298164         | Possum 442      | AAT40442         |
| Rhesus Monkey 968         | HM044968         | Opossum 113     | AF012113         |
| Marmoset 379              | AF397379         | Chicken 326     | M30326           |
| B. flying Fox 169         | GQ427169         | Chicken 329     | M30329           |
| Mouse 821                 | CH466821         | Chicken 324     | M30324           |
| Mouse 185                 | AM262185         | Chicken 333     | M30333           |
| Mouse 021                 | M27021           | Chicken 327     | M30327           |
| Mouse 569                 | K01569           | Chicken 328     | M30328           |
| Mouse 491                 | DQ113491         | Chicken 340     | M30340           |
| Mouse 508                 | CAA85508         | Frog 255        | M27255           |
| Rat 756                   | AM293756         | Frog 681        | M24681           |
| Dolphin 195               | AJ320195         | Frog VHδ5.1     | GQ262028         |
| Cow 765                   | DQ485765         | Frog 677        | M24677           |

**Figure 5**

| <b>Sequence</b>      | <b>GenBank #</b>     | <b>Sequence</b>          | <b>GenBank #</b> |
|----------------------|----------------------|--------------------------|------------------|
| Human C $\delta$     | M21624               | Platypus C $\mu$         | XP_001516799     |
| Rabbit C $\delta$    | D26555               | Chicken C $\delta$ 1     | Chr 27: 141100   |
| Mouse C $\delta$     | M37694               | Chicken C $\delta$ 2     | Chr 10: 95442    |
| Rat C $\delta$       | AF196214             | Duck C $\delta$          | AF415216         |
| Hedgehog C $\delta$  | Scaffold 6439:87631  | Turkey C $\delta$ 1      | Chr 29: 112003   |
| Dog C $\delta$       | XP_849861            | Turkey C $\delta$ 2      | Chr 10: 2967081  |
| Pig C $\delta$       | L21163               | Zebra finch C $\delta$ 1 | Chr 27: 3021481  |
| Cow C $\delta$       | D90420               | Zebra finch C $\delta$ 2 | Chr 27: 3039847  |
| Sheep C $\delta$     | Z12963               | Axolotl C $\delta$       | AAK33006         |
| Elephant C $\delta$  | Scaffold 7499:121555 | Frog C $\delta$ 1        | DQ022688         |
| Armadillo C $\delta$ | Scaffold 60423:42948 | Frog C $\delta$ 2        | GQ262036         |
| Opossum C $\delta$   | XP_001379771         | Flounder C $\delta$ 1    | AB081562         |
| Opossum C $\mu$      | XP_001369282         | Horn shark C $\delta$    | U22673           |
| Platypus C $\delta$  | Contig 588:545318    |                          |                  |

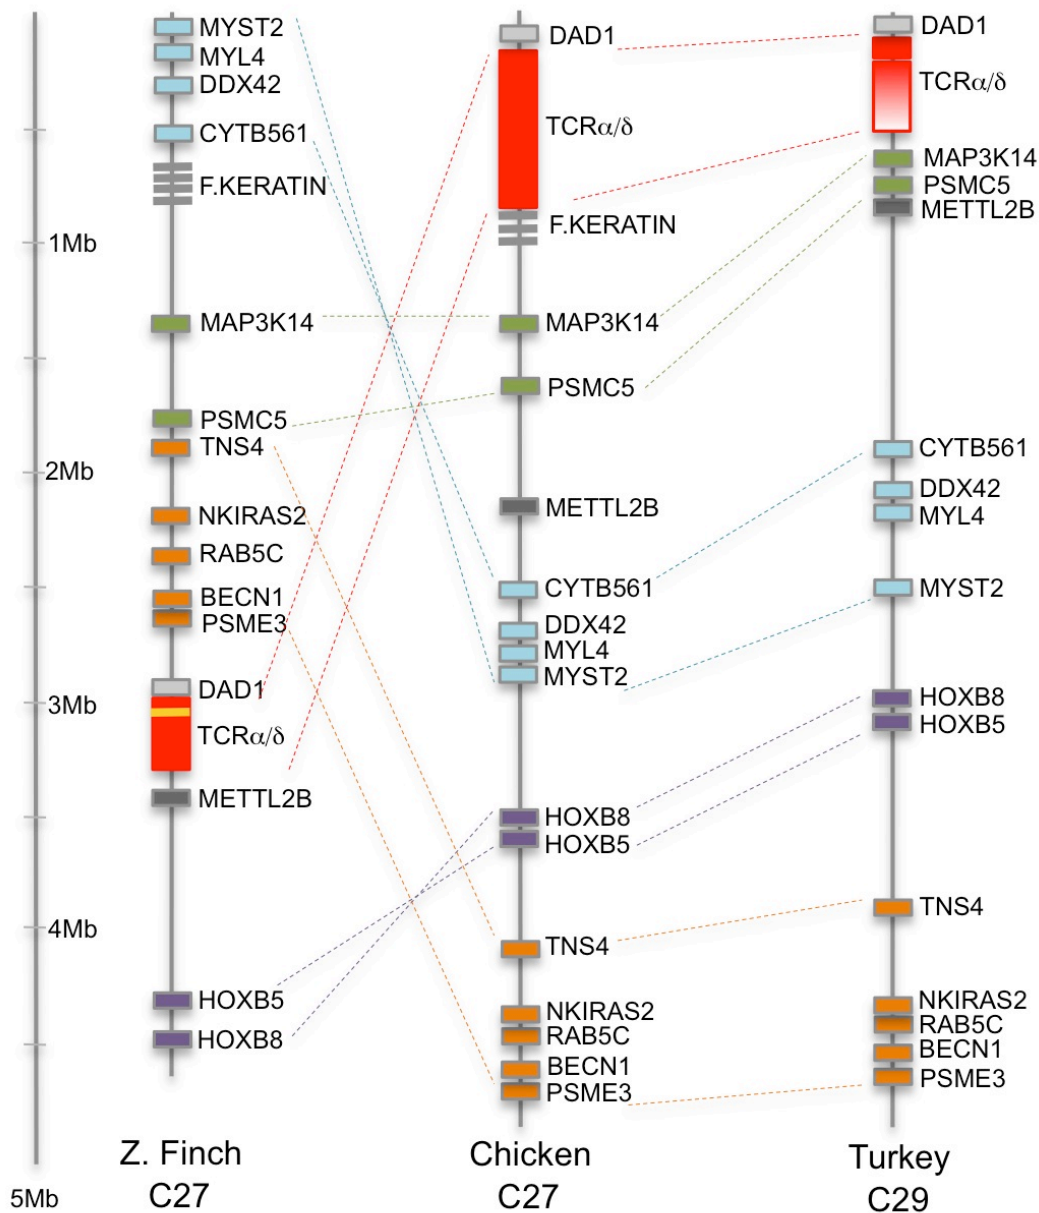

**SD Figure 1.** Representation of avian orthologous chromosomes containing the conventional *TCRα/δ* locus in the zebra finch, chicken and turkey. The *TCRα/δ* locus is indicated in red. Conserved blocks of genes are indicated by common colors and connected by dashed lines to illustrate translocations and inversions in these orthologous chromosomes.

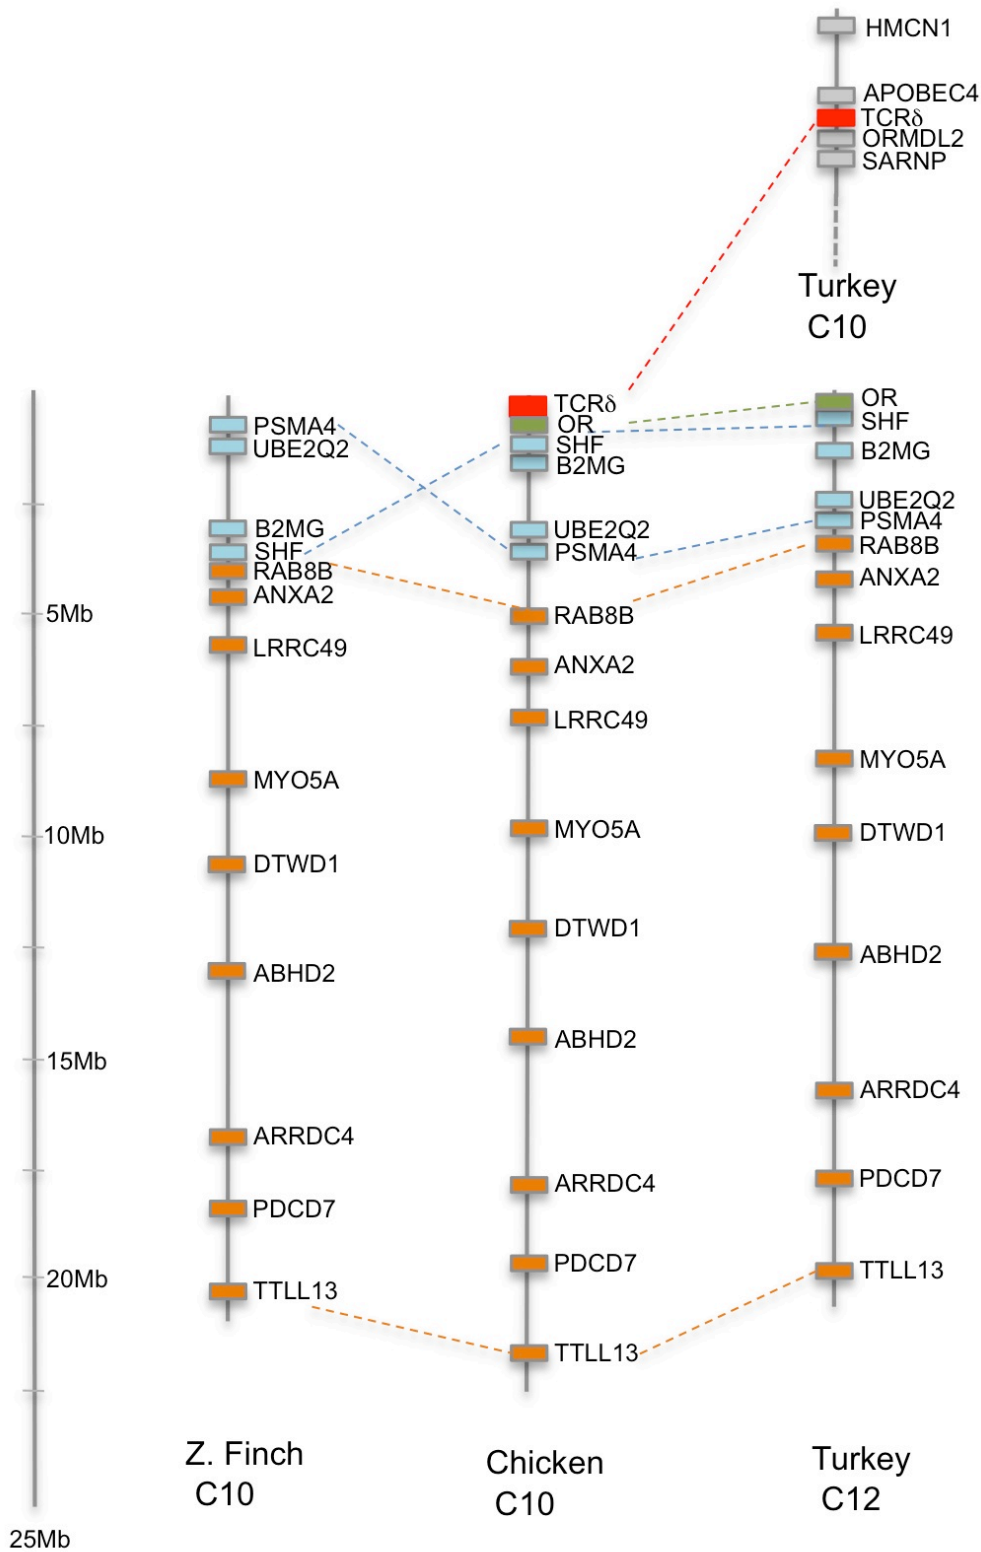

**SD Figure 2.** Atypical TCR $\delta$  chromosomal location in the Galliformes. Atypical TCR $\delta$  chromosomal location in the chicken compared to the orthologous chromosomes from turkey and zebra finch. Atypical TCR $\delta$  is indicated in red. Atypical TCR $\delta$  and flanking genes are indicated in partial turkey chromosome 10. Blocks of genes are indicated by common colors as in SD figure 1.
